# Supplementary material for: Ventricular tachyarrhythmia and sudden cardiac death with domperidone use in Parkinson's disease
Source: PubMed Central journal article supplement — Br J Clin Pharmacol. 2016 May 19;82(2):461–72. doi: 10.1111/bcp.12964 (PMC4972162; doi:10.1111/bcp.12964), 2016-05-19
Supplement: BCP-82-461-s001.pdf [file BCP-82-461-s001.pdf]

# Appendices

Appendix 1 - Figure 1. Case Definition

Appendix 2 - Figure 2. Adjusted rate ratios of ventricular tachyarrhythmia/sudden cardiac death associated with recent use of (top panel) and past use (bottom panel) of domperidone compared to no use.

Appendix 3 - Figure 3. Adjusted rate ratios of ventricular tachyarrhythmia/sudden cardiac death associated with current use of domperidone compared to no use. Exposure measured in the 60 days prior to index date.

Appendix 4 - Figure 4. Adjusted rate ratios of ventricular tachyarrhythmia/sudden cardiac death associated with current use of domperidone compared to no use, adjusting for covariates measured 366 to 730 days before index date.

Appendix 5 - Figure 5. Adjusted rate ratios of ventricular tachyarrhythmia/sudden cardiac death associated with current use of domperidone compared to no use, adjusting for covariates measured in the year before cohort entry.

Appendix 6 - Figure 6. Adjusted rate ratios of ventricular tachyarrhythmia/sudden cardiac death associated with current use of domperidone compared to no use. Exclusion of patients with long hospital stay.

Appendix 7 - Figure 7. Adjusted rate ratios of ventricular tachyarrhythmia/sudden cardiac death associated with current use of domperidone compared to no use. Exclusion of unattended death.

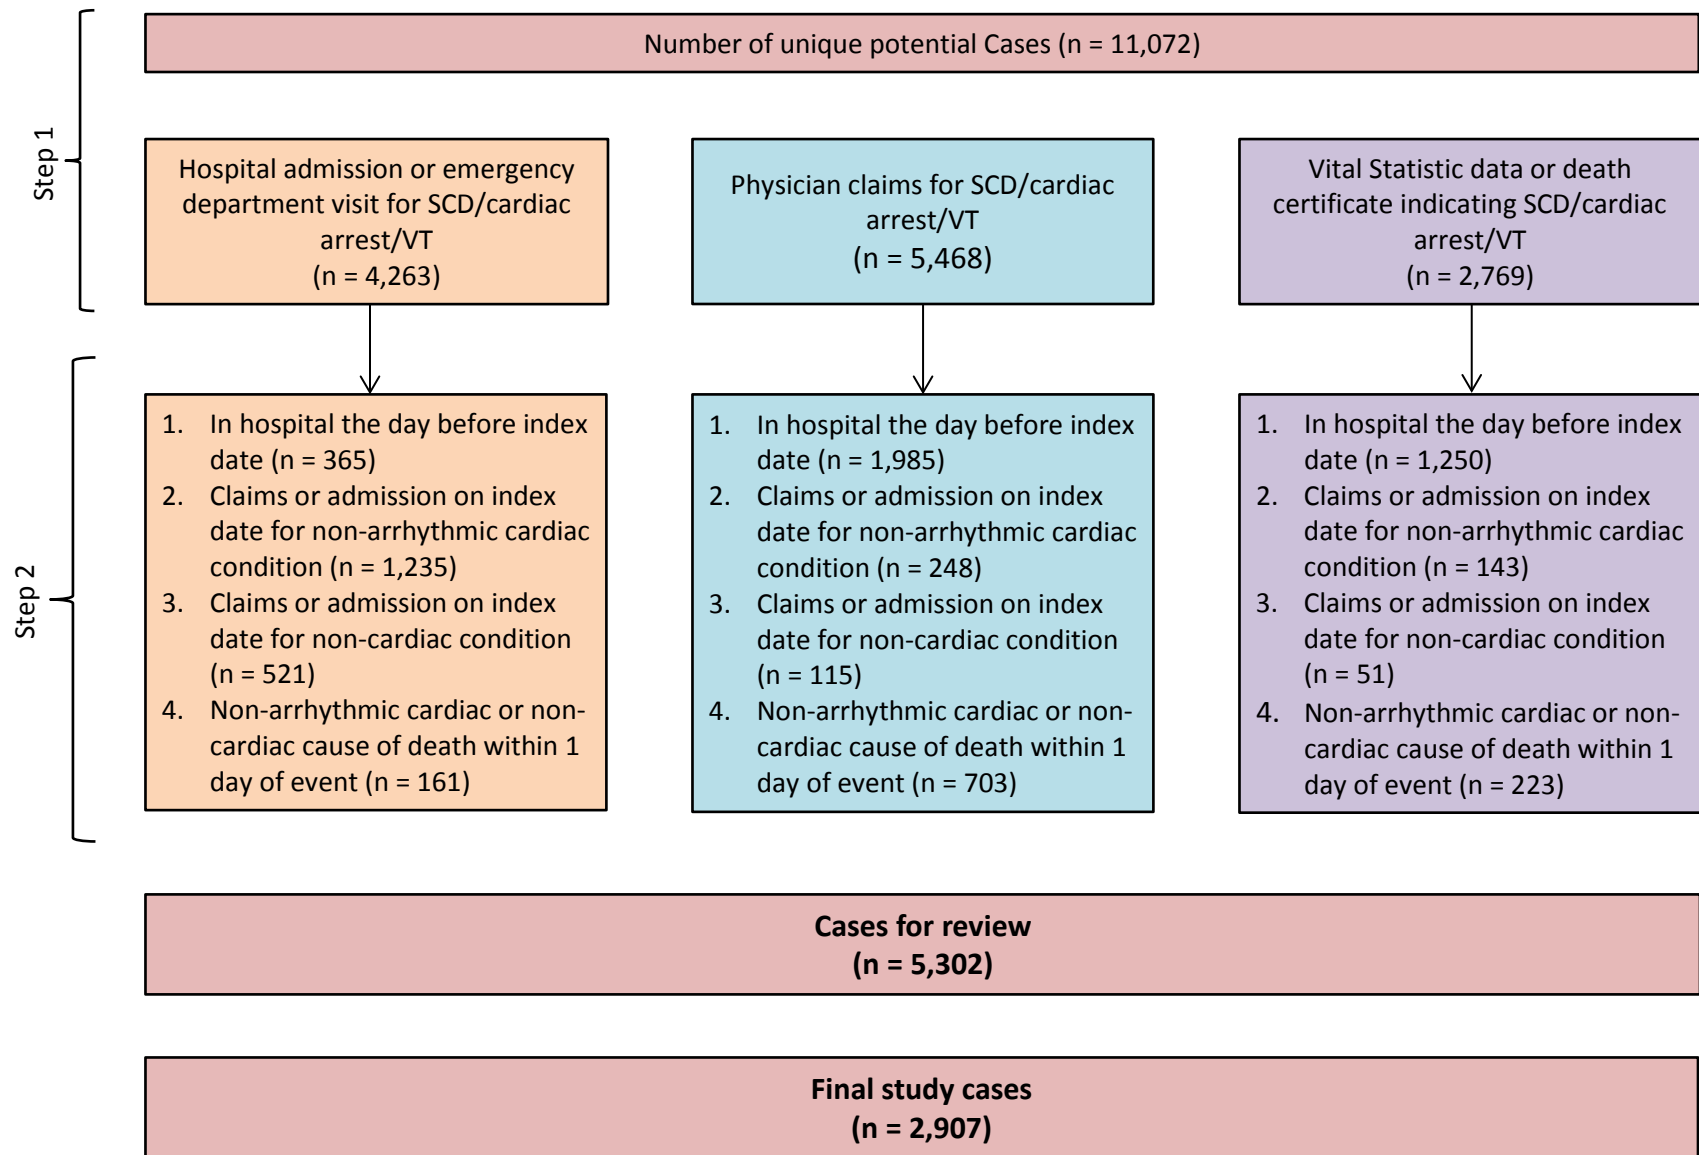

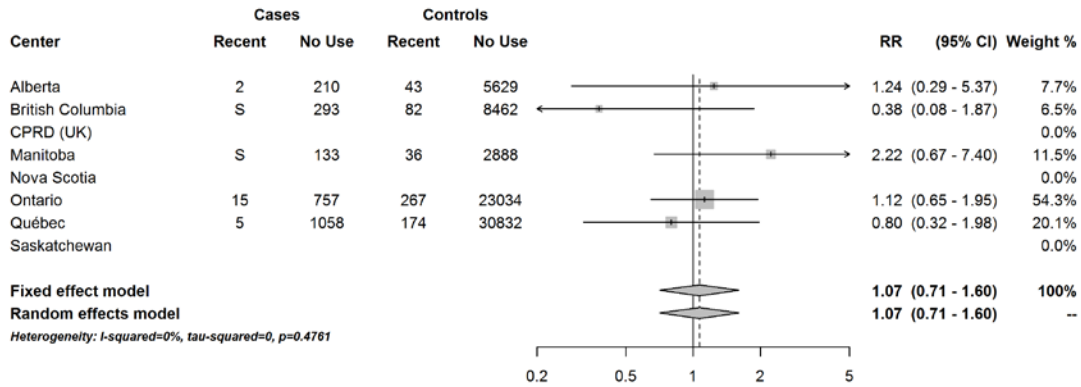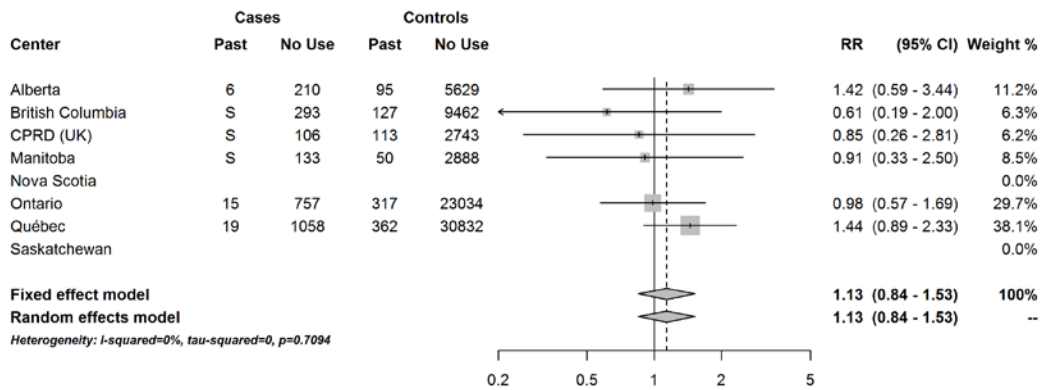

Small cells (count $\leq$ 5) were suppressed by participating sites due to privacy restrictions  
 CPRD, Clinical practice research datalink

**Appendix Figure 2. Adjusted rate ratios of ventricular tachyarrhythmia/sudden cardiac death associated with recent use of (top panel) and past use (bottom panel) of domperidone compared to no use.**

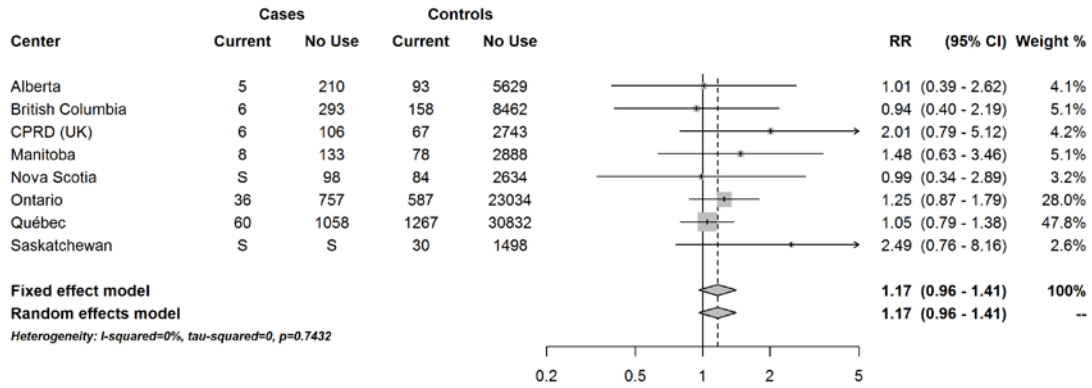

Small cells (count $\leq$ 5) were suppressed by participating sites due to privacy restrictions  
 CPRD, Clinical practice research datalink

**Appendix Figure 3. Adjusted rate ratios of ventricular tachyarrhythmia/sudden cardiac death associated with current use of domperidone compared to no use. Exposure measured in the 60 days prior to index date.**

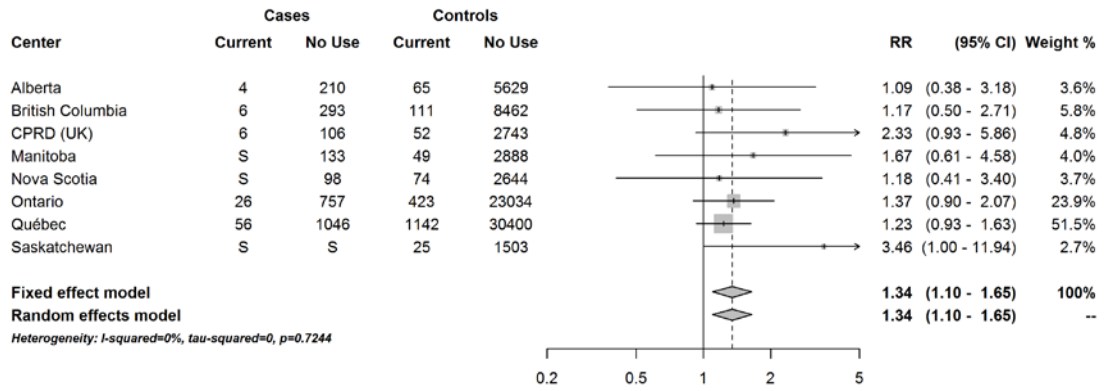

Small cells (count $\leq$ 5) were suppressed by participating sites due to privacy restrictions  
 CPRD, Clinical practice research datalink

**Appendix Figure 4. Adjusted rate ratios of ventricular tachyarrhythmia/sudden cardiac death associated with current use of domperidone compared to no use, adjusting for covariates measured 366 to 730 days before index date.**

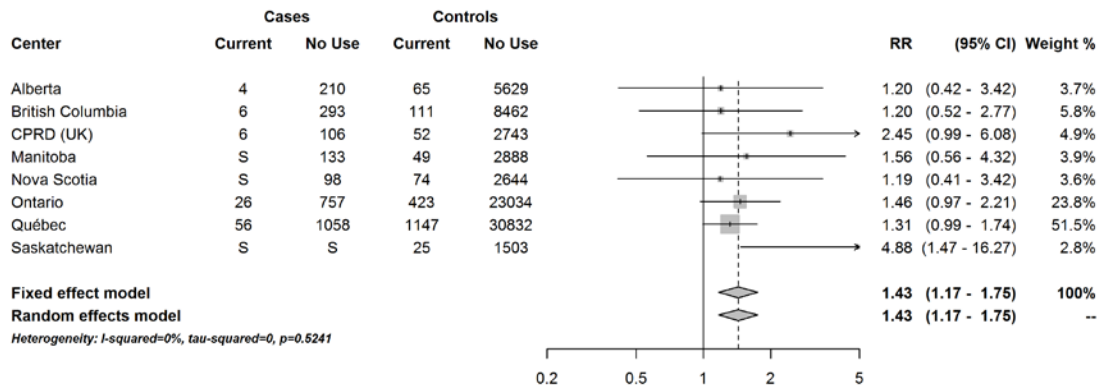

Small cells (count $\leq$ 5) were suppressed by participating sites due to privacy restrictions  
 CPRD, Clinical practice research datalink

**Appendix Figure 5. Adjusted rate ratios of ventricular tachyarrhythmia/sudden cardiac death associated with current use of domperidone compared to no use, adjusting for covariates measured in the year before cohort entry.**

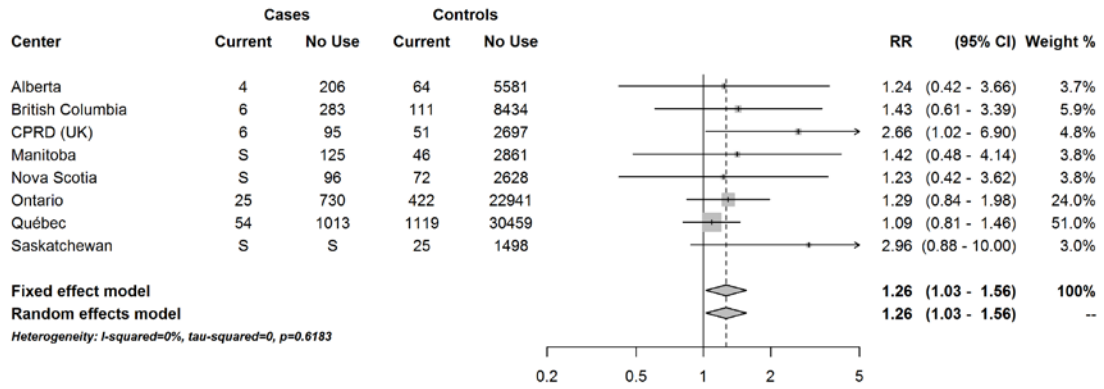

Small cells (count $\leq$ 5) were suppressed by participating sites due to privacy restrictions  
 CPRD, Clinical practice research datalink

**Appendix Figure 6. Adjusted rate ratios of ventricular tachyarrhythmia/sudden cardiac death associated with current use of domperidone compared to no use. Exclusion of patients with long hospital stay.**

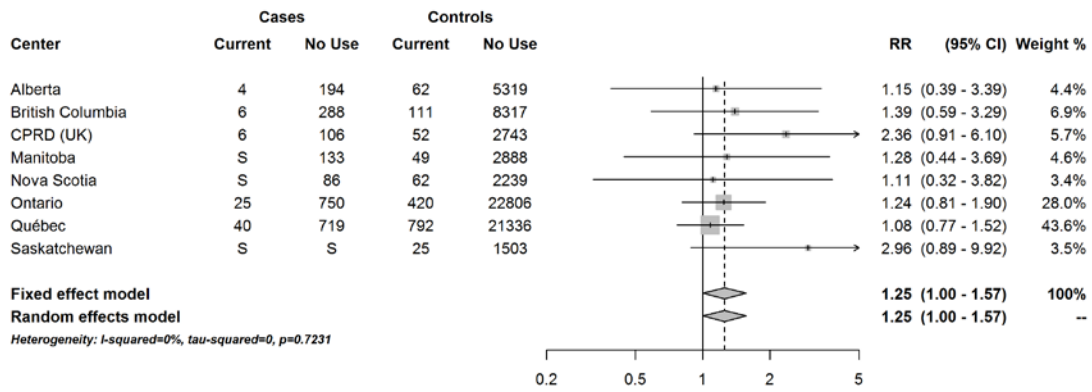

Small cells (count $\leq$ 5) were suppressed by participating sites due to privacy restrictions  
 CPRD, Clinical practice research datalink

**Appendix Figure 7. Adjusted rate ratios of ventricular tachyarrhythmia/sudden cardiac death associated with current use of domperidone compared to no use. Exclusion of unattended death.**
